# Supplementary material
Source: Springer Nature journal article supplement (https://www.springermedizin.de/resource/supplementary/12885_2014_4910_MOESM4_ESM.pdf/9467706)
Supplement: MOESM4 [file 9467706]

| Type of <i>BRAF</i> mutation                                                                                                                                                                         | Type of tumor                                                                                                           | <i>BRAF</i> mutant protein                                                                                                                                                                                   | Tumor cells sensitivity to Vemurafenib treatment                                                                                                                                                                                                                                |
|------------------------------------------------------------------------------------------------------------------------------------------------------------------------------------------------------|-------------------------------------------------------------------------------------------------------------------------|--------------------------------------------------------------------------------------------------------------------------------------------------------------------------------------------------------------|---------------------------------------------------------------------------------------------------------------------------------------------------------------------------------------------------------------------------------------------------------------------------------|
| <b>Biallelic</b><br>p.V600D and p.K601del<br>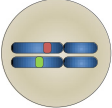                                                                        | Homogeneous tumor:<br>one clone<br>    | $BRAF^{V600D}$ and $BRAF^{K601del}$<br>                                                                                     |  Vemurafenib treatment<br><b>Predicted sensitivity:</b><br>- <i>In vitro</i> data for $BRAF^{V600D}$ and no data indicating that $BRAF^{K601del}$ could be a resistance mutation               |
| <b>Biclonal</b><br>p.K601del<br><br> | Heterogeneous tumor:<br>two clones<br> | <br>$BRAF^{K601del}$<br><br>$BRAF^{V600D}$ |  Vemurafenib treatment ?<br> Vemurafenib treatment<br><b>Predicted sensitivity:</b><br>- <i>In vitro</i> data |
| <b>Monoallelic</b><br>p.V600DK601del<br>                                                                             | Homogeneous tumor:<br>one clone<br>   | $BRAF^{V600DK601del}$<br>                                                                                                   |  Vemurafenib treatment ?                                                                                                                                                                       |

■ V600D  
■ K601del
